# Supplementary material for: NTRK2 expression levels are reduced in laser captured pyramidal neurons from the anterior cingulate cortex in males with autism spectrum disorder
Source: Springer Nature journal article supplement (doi:10.1186/s13229-015-0023-2), 2015-05-14
Supplement: MOESM1 [file 9785376]

**Additional File 1.** Primer information

| <b>Target or Reference</b> | <b>Genbank Accession Number</b>                                            | <b>Primer Sequence</b>                                           | <b>PCR Product Size (bp)</b> |
|----------------------------|----------------------------------------------------------------------------|------------------------------------------------------------------|------------------------------|
| <i>AQP4</i>                | NM_001650<br>NM_004028                                                     | (f) TCCAAACGGACTGATGTCACTGGCT<br>(r) CAAAGGATCGGGCGGGATTTCATGC   | 118                          |
| <i>BDNF</i>                | NM_170735<br>NM_170732<br>NM_170731<br>NM_001709<br>NM_170733<br>NM_170734 | (f) AGAGCCCTGTATCAACCCAGAAACACC<br>(r) GCAATGCCAACTCCACATAGCCTCC | 112                          |
| <i>GAPDH</i>               | NM_002046                                                                  | (f) TGCACCACCAACTGCTTAGC<br>(r) GGCATGGACTGTGGTCATGAG            | 87                           |
| <i>GRIA1</i>               | NM_001200                                                                  | (f) GTGCGCAGCTTCCACCATGAA<br>(r) CTGAGGTGATAAACTCCTCCGTGGG       | 122                          |
| <i>GRIK2</i>               | NM_000830<br>NM_175611                                                     | (f) ATTGACTCCAAAGGTTACGGAGTGGG<br>(r) GCAGCTTCCCTTCTTCTTGGAGTTGA | 100                          |
| <i>GRIN1</i>               | NM_000832<br>NM_021569<br>NM_007327                                        | (f) CCTGGAAGCAGAACGTCTCCCTGT<br>(r) TGCTGCGCGAGTCACATTCCTGAT     | 108                          |
| <i>GRIN2A</i>              | NM_001134407<br>NM_000833<br>NM_001134408                                  | (f) TCGACCTGGCCTTGCTTCAGTTTGT<br>(r) GCTGGCTGCTCATCACCTCGTTCTT   | 111                          |
| <i>GRIN2B</i>              | NM_000834                                                                  | (f) CCTCATCACCTTCATCTGCG<br>(r) CATGGATGCAGCTGTAGATACC           | 125                          |
| <i>GRIN2C</i>              | NM_000835                                                                  | (f) TGGTGGCCATCACCGTCTTCAT<br>(r) CCACACGGACTTGCCGATAGTGA        | 116                          |
| <i>GRIN2D</i>              | NM_000836                                                                  | (f) CTTCGTGGAGACCGGCATCAGCGTC<br>(r) ACGAACATCATCACCCACACGGCGG   | 108                          |
| <i>GRIP1</i>               | NM_021150                                                                  | (f) GCCACAGAACTCTCTCTTCTCCACC                                    | 96                           |

|                           |                                                                           |                                                                |     |
|---------------------------|---------------------------------------------------------------------------|----------------------------------------------------------------|-----|
|                           | NM_001178074                                                              | (r) CACTCTGTCTCCAATCTGTAGCACCC                                 |     |
| <i>GRM5<sup>a</sup></i>   | NM_000842                                                                 | (f) GCCAGCAGATCCAGCAGCCTAGTCA<br>(r) TCATTCTGGGCCACGTGACGGATT  | 101 |
| <i>GRM5<sup>b</sup></i>   | NM_000842<br>NM_001143831                                                 | Not available, purchased from Qiagen                           | 125 |
| <i>GRM8</i>               | NM_000845<br>NM_001127323<br>NM_001127326<br>NR_028041                    | Not available, purchased from Qiagen                           | 78  |
| <i>MOG</i>                | NM_002433.3<br>NM_206809.2                                                | (f) CCTGCTGGAAGATAACCCTGTTTG<br>(r) CACTCAGAAGGGATTTCGTAGCTC   | 134 |
| <i>NTRK2</i>              | NM_006180<br>NM_001007097<br>NM_001018064<br>NM_001018065<br>NM_001018066 | (f) TGTAGTGTGGCAGGTGATCCGGT<br>(r) GGAGCCCTGTGTGTGGCTTGTTT     | 96  |
| <i>RNA18S1</i>            | NR_003286                                                                 | (f) GTAACCCGTTGAACCCATT<br>(r) CCATCCAATCGGTAGTAGCG            | 131 |
| <i>SLC1A1<sup>a</sup></i> | NM_004170                                                                 | Not available, purchased from Qiagen                           | 110 |
| <i>SLC1A1<sup>b</sup></i> | NM_004170                                                                 | (f) CCTGAAGTCAGTACGGTGGATGCC<br>(r) GGGAGGCTTCACTTCTTCACGCTT   | 117 |
| <i>SLC1A2</i>             | NM_004171                                                                 | (f) CAAGCTTGGATCACTGCCCTGG<br>(r) GGTGCTCCAACAGGAAGGACGA       | 129 |
| <i>SLC1A3</i>             | NM_004172                                                                 | (f) TGCAAGCACTCATCACCGCTCTGGG<br>(r) ACGCGCTTGTCCACGCCATTGTTCT | 100 |
| <i>TATA</i>               | NM_003194                                                                 | (f) CACTTCGTGCCCGAAACGCCGAAT<br>(r) ATCAGTGCCGTGGTTCGTGGCTCT   | 88  |
| <i>UBC</i>                | NM_021009                                                                 | (f) ATTTGGGTCGCGGTTCTTG<br>(r) TGCCTTGACATTCTCGATGGT           | 133 |
| <i>VGlut1</i>             | NM_020309                                                                 | (f) TCGGAGAGAGCGCGAAACTCAT<br>(r) TGGCCACGATGATGGCATAGACT      | 99  |

- a Denotes use in RT-PCR experiments
- b Denotes use in Endpoint-PCR experiments
