# Supplementary material for: NTRK2 expression levels are reduced in laser captured pyramidal neurons from the anterior cingulate cortex in males with autism spectrum disorder
Source: Springer Nature journal article supplement (doi:10.1186/s13229-015-0023-2), 2015-05-14
Supplement: MOESM2 [file 9785376]

**Additional File 2.** Pearson's correlation analyses for possible relationships between gene expression levels in BA24 neurons and age, RNA quality (RIN) and postmortem interval (PMI).

| Gene <sup>a</sup> (protein <sup>b</sup> ) | Statistic           | Age   | RIN               | PMI   |
|-------------------------------------------|---------------------|-------|-------------------|-------|
| <i>RNA18S1 / GAPDH</i> <sup>c</sup>       | Pearson Correlation | -.309 | .043              | -.250 |
|                                           | Sig. (2-tailed)     | .243  | .875              | .350  |
|                                           | N                   | 16    | 16                | 16    |
| <i>GRIN1</i> (NR1)                        | Pearson Correlation | .050  | .318              | -.226 |
|                                           | Sig. (2-tailed)     | .855  | .231              | .400  |
|                                           | N                   | 16    | 16                | 16    |
| <i>GRIN2A</i> (NR2A)                      | Pearson Correlation | -.055 | .531              | .176  |
|                                           | Sig. (2-tailed)     | .851  | .051              | .548  |
|                                           | N                   | 14    | 14                | 14    |
| <i>GRIN2B</i> (NR2B)                      | Pearson Correlation | .109  | .579              | -.250 |
|                                           | Sig. (2-tailed)     | .687  | .019              | .351  |
|                                           | N                   | 16    | 16                | 16    |
| <i>GRIN2C</i> (NR2C)                      | Pearson Correlation | .229  | .642 <sup>d</sup> | -.091 |
|                                           | Sig. (2-tailed)     | .394  | .007              | .737  |
|                                           | N                   | 16    | 16                | 16    |
| <i>GRIN2D</i> (NR2D)                      | Pearson Correlation | .322  | .082              | .203  |
|                                           | Sig. (2-tailed)     | .224  | .763              | .452  |
|                                           | N                   | 16    | 16                | 16    |
| <i>GRIA1</i> (GluR-1)                     | Pearson Correlation | -.374 | .213              | -.012 |
|                                           | Sig. (2-tailed)     | .154  | .429              | .966  |
|                                           | N                   | 16    | 16                | 16    |
| <i>GRIK2</i> (GRIK2, GluK2)               | Pearson Correlation | -.316 | .250              | -.346 |
|                                           | Sig. (2-tailed)     | .233  | .350              | .189  |
|                                           | N                   | 16    | 16                | 16    |
| <i>GRM5</i> (mGluR5)                      | Pearson Correlation | -.017 | -.117             | -.435 |
|                                           | Sig. (2-tailed)     | .953  | .677              | .105  |
|                                           | N                   | 15    | 15                | 15    |
| <i>GRM8</i> (mGluR8)                      | Pearson Correlation | .131  | .140              | .029  |
|                                           | Sig. (2-tailed)     | .684  | .664              | .929  |
|                                           | N                   | 12    | 12                | 12    |
| <i>SLC1A1</i> (EAAT3)                     | Pearson Correlation | -.191 | .285              | -.591 |
|                                           | Sig. (2-tailed)     | .478  | .284              | .016  |

|                           | N                   | 16    | 16    | 16    |
|---------------------------|---------------------|-------|-------|-------|
| <i>SLC17A7</i> (VGlut1)   | Pearson Correlation | .003  | .312  | -.358 |
|                           | Sig. (2-tailed)     | .991  | .240  | .173  |
|                           | N                   | 16    | 16    | 16    |
| <i>GRIP1</i> (GRIP1)      | Pearson Correlation | -.128 | .265  | -.030 |
|                           | Sig. (2-tailed)     | .638  | .320  | .913  |
|                           | N                   | 16    | 16    | 16    |
| <i>BDNF</i> (BDNF)        | Pearson Correlation | .005  | -.084 | -.212 |
|                           | Sig. (2-tailed)     | .985  | .757  | .430  |
|                           | N                   | 16    | 16    | 16    |
| <i>NTRK2</i> (NTRK2,TrkB) | Pearson Correlation | .522  | .271  | -.076 |
|                           | Sig. (2-tailed)     | .038  | .310  | .780  |
|                           | N                   | 16    | 16    | 16    |

<sup>a</sup> Derived from the HUGO gene nomenclature committee responsible for designating unique gene names (Wain et al., 2002).

<sup>b</sup> Official protein nomenclature showing both the recommended and alternative protein names (Uniprot, 2008).

<sup>c</sup> Ratio of the two reference genes; all other expression data are normalized to the average of these two reference genes.

<sup>d</sup> Correlation is significant at  $p < 0.01$  (2-tailed).
