# Supplementary material for: NTRK2 expression levels are reduced in laser captured pyramidal neurons from the anterior cingulate cortex in males with autism spectrum disorder
Source: Springer Nature journal article supplement (doi:10.1186/s13229-015-0023-2), 2015-05-14
Supplement: MOESM3 [file 9785376]

**Additional File 3.** Pearson's correlation analyses for possible relationships between gene expression levels in BA24 astrocytes and age, RNA quality (RIN) and postmortem interval (PMI).

| <b>Gene<sup>a</sup> (protein<sup>b</sup>)</b> | <b>Statistic</b>    | <b>Age</b>        | <b>RIN</b> | <b>PMI</b>         |
|-----------------------------------------------|---------------------|-------------------|------------|--------------------|
| <i>RNA18S / GAPDH<sup>c</sup></i>             | Pearson Correlation | .074              | .119       | .443               |
|                                               | Sig. (2-tailed)     | .786              | .662       | .085               |
|                                               | N                   | 16                | 16         | 16                 |
| <i>GRIN1 (NR1)</i>                            | Pearson Correlation | .092              | .133       | -.003              |
|                                               | Sig. (2-tailed)     | .736              | .624       | .991               |
|                                               | N                   | 16                | 16         | 16                 |
| <i>GRIN2A (NR2A)</i>                          | Pearson Correlation | .282              | .516       | -.116              |
|                                               | Sig. (2-tailed)     | .290              | .041       | .670               |
|                                               | N                   | 16                | 16         | 16                 |
| <i>GRIN2B (NR2B)</i>                          | Pearson Correlation | .523              | .520       | -.060              |
|                                               | Sig. (2-tailed)     | .038              | .039       | .826               |
|                                               | N                   | 16                | 16         | 16                 |
| <i>GRIN2D (NR2D)</i>                          | Pearson Correlation | .547              | .395       | .227               |
|                                               | Sig. (2-tailed)     | .028              | .130       | .398               |
|                                               | N                   | 16                | 16         | 16                 |
| <i>GRIA1 (GluR-1)</i>                         | Pearson Correlation | -.046             | .490       | .009               |
|                                               | Sig. (2-tailed)     | .865              | .054       | .975               |
|                                               | N                   | 16                | 16         | 16                 |
| <i>GRM5 (mGluR5)</i>                          | Pearson Correlation | .577              | .328       | .112               |
|                                               | Sig. (2-tailed)     | .019              | .216       | .679               |
|                                               | N                   | 16                | 16         | 16                 |
| <i>SLC1A3 (EAAT1)</i>                         | Pearson Correlation | -.340             | -.238      | -.344              |
|                                               | Sig. (2-tailed)     | .197              | .375       | .192               |
|                                               | N                   | 16                | 16         | 16                 |
| <i>SLC1A2 (EAAT2)</i>                         | Pearson Correlation | -.101             | .023       | -.186              |
|                                               | Sig. (2-tailed)     | .711              | .932       | .491               |
|                                               | N                   | 16                | 16         | 16                 |
| <i>SLC17A7 (vGlut1)</i>                       | Pearson Correlation | -.470             | .214       | -.655 <sup>d</sup> |
|                                               | Sig. (2-tailed)     | .066              | .426       | .006               |
|                                               | N                   | 16                | 16         | 16                 |
| <i>GRIP1 (GRIP1)</i>                          | Pearson Correlation | -.086             | -.146      | .378               |
|                                               | Sig. (2-tailed)     | .751              | .590       | .149               |
|                                               | N                   | 16                | 16         | 16                 |
| <i>BDNF (BDNF)</i>                            | Pearson Correlation | .479              | -.153      | .492               |
|                                               | Sig. (2-tailed)     | .060              | .571       | .053               |
|                                               | N                   | 16                | 16         | 16                 |
| <i>NTRK2 (NTRK2, TrkB)</i>                    | Pearson Correlation | .711 <sup>d</sup> | .123       | .187               |
|                                               | Sig. (2-tailed)     | .002              | .649       | .488               |
|                                               | N                   | 16                | 16         | 16                 |

<sup>a</sup> Derived from the HUGO gene nomenclature committee responsible for designating unique gene names (Wain et al., 2002).

<sup>b</sup> Official protein nomenclature showing both the recommended and alternative protein names (Uniprot, 2008).

<sup>c</sup> Ratio of the two reference genes; all other expression data are normalized to the average of these two reference genes.

<sup>d</sup> Correlation is significant at  $p < 0.01$  (2-tailed).
