# Supplementary material for: NTRK2 expression levels are reduced in laser captured pyramidal neurons from the anterior cingulate cortex in males with autism spectrum disorder
Source: Springer Nature journal article supplement (doi:10.1186/s13229-015-0023-2), 2015-05-14
Supplement: MOESM4 [file 9785376]

**Additional File 4.** Pearson's correlation analyses for possible relationships between gene expression levels in BA10 neurons and age, RNA quality (RIN) and postmortem interval (PMI).

| Gene <sup>a</sup> (protein <sup>b</sup> ) | Statistic           | Age   | RIN   | PMI   |
|-------------------------------------------|---------------------|-------|-------|-------|
| <i>RNA18S1 / GAPDH</i> <sup>c</sup>       | Pearson Correlation | -.122 | -.407 | .002  |
|                                           | Sig. (2-tailed)     | .653  | .148  | .995  |
|                                           | N                   | 16    | 14    | 14    |
| <i>GRIN1</i> (NR2A)                       | Pearson Correlation | .114  | .415  | .059  |
|                                           | Sig. (2-tailed)     | .675  | .140  | .841  |
|                                           | N                   | 16    | 14    | 14    |
| <i>GRM5</i> (mGluR5)                      | Pearson Correlation | .328  | .228  | .088  |
|                                           | Sig. (2-tailed)     | .215  | .432  | .765  |
|                                           | N                   | 16    | 16    | 14    |
| <i>SLC1A1</i> (EAAT3)                     | Pearson Correlation | -.105 | .659  | .282  |
|                                           | Sig. (2-tailed)     | .722  | .020  | .374  |
|                                           | N                   | 14    | 12    | 12    |
| <i>NTRK2</i> (NTRK2, TrkB)                | Pearson Correlation | -.234 | .537  | -.094 |
|                                           | Sig. (2-tailed)     | .420  | .072  | .773  |
|                                           | N                   | 14    | 12    | 12    |

<sup>a</sup> Derived from the HUGO gene nomenclature committee responsible for designating unique gene names (Wain et al., 2002).

<sup>b</sup> Official protein nomenclature showing both the recommended and alternative protein names (Uniprot, 2008).

<sup>c</sup> Ratio of the two reference genes; all other expression data are normalized to the average of these two reference genes.
